## Correction

# Correction: A Meta Analysis of Lumbar Spinal Fusion Surgery Using Bone Morphogenetic Proteins and Autologous Iliac Crest Bone Graft

### The PLOS ONE Staff

The first author, Haifei Zhang, is missing an affiliation. Haifei Zhang should also be affiliated with: Department of Orthopedics, The first Affiliated Hospital, China Medical University, Shenyang, China

### Reference

1. Zhang H, Wang F, Ding L, Zhang Z, Sun D, et al. (2014) A Meta Analysis of Lumbar Spinal Fusion Surgery Using Bone Morphogenetic Proteins and Autologous Iliac Crest Bone Graft. PLoS ONE 9(6): e97049. doi:10.1371/journal.pone.0097049

**Citation:** The PLOS ONE Staff (2014) Correction: A Meta Analysis of Lumbar Spinal Fusion Surgery Using Bone Morphogenetic Proteins and Autologous Iliac Crest Bone Graft. PLoS ONE 9(12): e116460. doi:10.1371/journal.pone.0116460

**Published:** December 19, 2014

**Copyright:** © 2014 The PLOS ONE Staff. This is an open-access article distributed under the terms of the Creative Commons Attribution License, which permits unrestricted use, distribution, and reproduction in any medium, provided the original author and source are credited.
